# Supplementary material for: Cannabidiol blood metabolite levels after cannabidiol treatment are associated with broadband EEG changes and improvements in visuomotor and non-verbal cognitive abilities in boys with autism requiring higher levels of support
Source: Springer Nature journal article supplement (doi:10.1038/s41398-026-03815-y), 2026-01-30

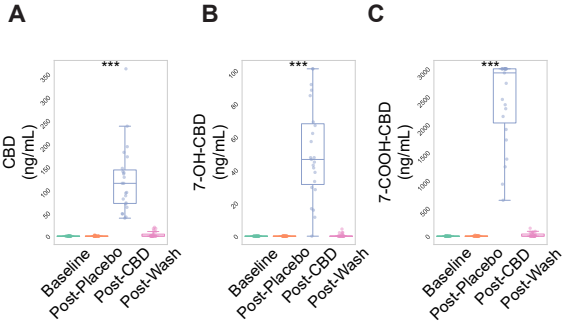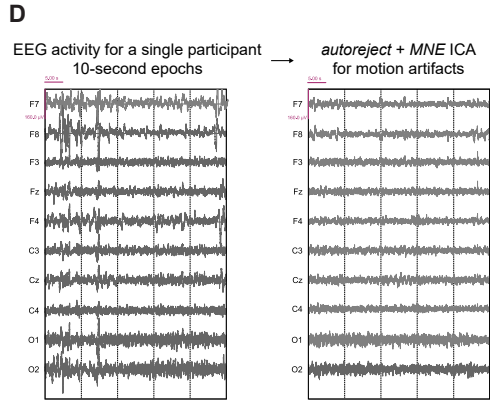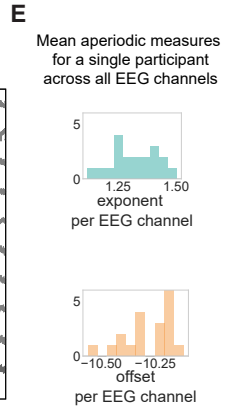

Supplement: MOESM2 [file 41398_2026_3815_MOESM2_ESM.pdf]
